# Supplementary material for: A high performance method for the accurate and precise determination of silicon isotopic compositions in bulk silicate rock samples using laser ablation MC-ICP-MS
Source: Royal Society of Chemistry journal article supplement (doi:10.1039/d0ja00036a), 2020-01-01
Supplement: d0ja00036a1.pdf [file d0ja00036a1.pdf]

**High performance method for the accurate and precise  
determination of silicon isotopic compositions in bulk silicate rock  
samples using laser ablation MC-ICP-MS**

Chenxi Zhang, He Zhao, Wen Zhang, Tao Luo, Ming Li, Keqing Zong, Yongsheng

Liu and Zhaochu Hu \*

*State Key Laboratory of Geological Processes and Mineral Resources, China*

*University of Geosciences, Wuhan, 430074, PR China (\*E-mail: zchu@vip.sina.com)*

*\*Author to whom correspondence should be sent.*

*Tel.: +86 27 61055600, Fax: +86 27 67885096*

*We contribute this manuscript to an upcoming themed issue dedicated to Professor*

*Gary Hieftje in JAAS.*

Figure S1. Schematic of the in-house water vapor introduction system.<sup>1</sup>

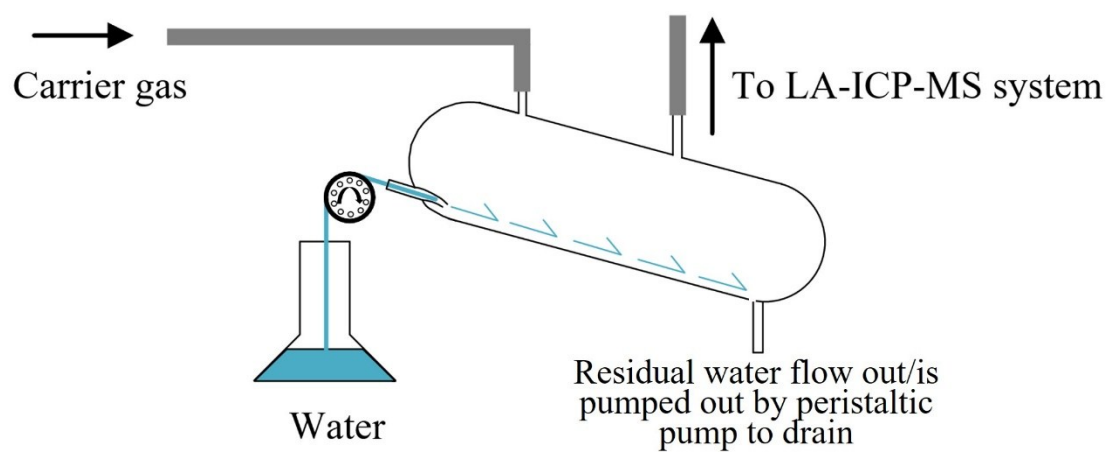

<sup>1</sup> S. H. Liu, Z. C. Hu, D. Günther, Y. H. Ye, Y. S. Liu, S. Gao and S. H. Hu, *J. Anal. At.*

*Spectrom.*, 2014, 29, 536.
